# Supplementary material for: Loss of membrane‐bound lytic transglycosylases increases outer membrane permeability and β‐lactam sensitivity in Pseudomonas aeruginosa
Source: PubMed Central journal article supplement (PMC4694138; doi:10.1002/mbo3.286), 2015-09-15
Supplement: MBO3-4-0879-s001.pdf [file MBO3-4-0879-s001.pdf]

**Table S1. Primer details for PCR confirmation of LT mutant strains.**

| Gene <sup>a</sup> | Primer name <sup>b</sup> | Primer sequence (5'-3')                        |
|-------------------|--------------------------|------------------------------------------------|
| <i>mltA</i>       | mltAFwd                  | TTT GAC GCA CCG TCG CGC TTT GCC CAA GC         |
|                   | mltAmid                  | GCT GGA GGA ACG CAG GCT ATA GAC CTG CAT CC     |
|                   | mltARev                  | GGC GTC ATT CAT CGT TTG AAT GGT TGC TGC C      |
| <i>mltB</i>       | mltBFwd                  | AGT ACA GCA TCA CCG GGT TAT CGA ACT CG         |
|                   | mltBmid                  | GAC CAT CCT GTC GAT GAA GTG CTG TGC            |
|                   | mltBRev                  | TTC GCC ATC GAG CAC TTG TTC ATC GAC TG         |
| <i>mltD</i>       | mltDFwd                  | CTT GAC CAC TCT TGA GGT CAT TTC TAG AAT CGG    |
|                   | mltDmid                  | GCT CGA CCA CGT AGT GCA TGT AGA GG             |
|                   | mltDRev                  | ATC AGG AAG GAG AGG CGA CGC ATC AGG            |
| <i>mltF</i>       | mltFFwd                  | TGC TTG CGG GCT GTA GCG AGG CGA AAG C          |
|                   | mltFmid                  | CCT CGC GGG AAA GCT GGG CAT AGA GGT CG         |
|                   | mltFRev                  | CGA TCT CGA TAT CCG TGG TTC CAG CGA GG         |
| <i>mltF2</i>      | mltF2Fwd                 | GCT TGT AGA ACA ATC CGT TAT AAT CGC AGA TCG    |
|                   | mltF2mid                 | CGG CTG TTG AGG TAT TGC TCG AAG G              |
|                   | mltF2Rev                 | GGA TAA GAT GGG CAC ACT ATA GGC AAG ATA ATT CG |
| <i>slt</i>        | sltFwd                   | CGG TGA ACT TGA GCA GGG TCA TGG GC             |
|                   | sltmid                   | AGA CGG CGT TGT TCG GTC AGG GAA GC             |
|                   | sltRev                   | TCT TCA GCA GGG TTT TCT GGC CGT CG             |
| <i>sltG</i>       | sltGFwd                  | GCC ATG GAT GAC CGT TCA CCG TAC AAG G          |
|                   | sltGmid                  | ACC GTG TAC TTG TCC ACG CCG TAG C              |
|                   | sltGRev                  | TGC CAC AAC TTC GAG TTC ATG GAC TTC ACC        |
| <i>sltH</i>       | sltHFwd                  | CCG ATG GAA CCA CAT TGG CGA ACC                |
|                   | sltHmid                  | CGA TCG AAG GTC TGC GCA TCG ATT CC             |
|                   | sltHRev                  | ACC TGG AAT ACT TGT TTT GCC AGA TCC AGA CC     |

<sup>a</sup>Gene name refers to the gene that has been deleted.

<sup>b</sup>Fwd (forward) and Rev (reverse) PCR primers anneal to loci flanking the deleted gene and yield a truncated PCR product in knockout strains. "Mid" primers are specific for the deleted gene and yield no PCR product in knockout strains.

**Table S2. MICs for all LT mutants of  $\beta$ -lactam, fluoroquinolone, and glycopeptide antibiotics**

| Strain                | Minimum Inhibitory Concentration ( $\mu\text{g/mL}$ ) <sup>abc</sup> |            |         |      |       |                 |     |
|-----------------------|----------------------------------------------------------------------|------------|---------|------|-------|-----------------|-----|
|                       | PP                                                                   | CT         | TZ      | IP   | CI    | VA              | PMB |
| PAO1                  | 6 (4)                                                                | 12 (8)     | 1 (2)   | 1    | 0.19  | >256<br>(2,048) | (1) |
| <i>ampC</i>           | 2 (1)                                                                | 4 (4)      | — (0.5) | 0.5  | nd    | nd              | nd  |
| <i>dacB</i>           | 64 (32)                                                              | >256 (128) | 16 (16) | —    | nd    | nd              | nd  |
| <i>dacB/slt</i>       | 32 (8)                                                               | 128 (64)   | 8 (8)   | —    | nd    | nd              | nd  |
| <i>slt</i>            | 3 (1)                                                                | 6 (4)      | 0.5 (1) | —    | —     | —               | nd  |
| <i>slt</i> (E503A)    | 4 (1)                                                                | 6 (4)      | 0.5 (1) | —    | nd    | nd              | nd  |
| <i>sltB1</i>          | 16 (8)                                                               | 24 (16)    | — (—)   | —    | —     | —               | nd  |
| <i>sltB1/ampC</i>     | 4 (2)                                                                | 4 (4)      | — (1)   | 0.5  | nd    | nd              | nd  |
| <i>sltG</i>           | —                                                                    | 16         | —       | 1.5  | —     | —               | nd  |
| <i>sltH</i>           | 12 (8)                                                               | 32 (16)    | — (—)   | 1.5  | —     | —               | nd  |
| <i>sltH/ampC</i>      | 4 (2)                                                                | 16 (4)     | — (1)   | 0.25 | nd    | nd              | nd  |
| <i>slt/mltB</i>       | —                                                                    | 16         | 1.5     | 1.5  | —     | —               | nd  |
| <i>slt/mltF</i>       | 3 (1)                                                                | 6 (4)      | — (1)   | —    | —     | —               | nd  |
| <i>sltB1/mltB</i>     | 32 (16)                                                              | 96 (32)    | 1.5 (—) | 0.75 | —     | —               | nd  |
| <i>sltB1/slt</i>      | 12 (—)                                                               | 24 (—)     | — (1)   | 0.5  | —     | —               | nd  |
| <i>sltB1/G</i>        | 16 (8)                                                               | 24 (16)    | 1.5 (—) | —    | —     | —               | nd  |
| <i>sltB1/H</i>        | 32 (16)                                                              | 48 (16)    | 1.5 (—) | —    | —     | —               | nd  |
| <i>sltB1/G/mltB</i>   | 24 (8)                                                               | 32 (16)    | — (—)   | —    | —     | —               | nd  |
| <i>sltB1/G/H</i>      | 12 (8)                                                               | 16 (—)     | — (—)   | —    | —     | —               | nd  |
| <i>sltB1/G/H/mltB</i> | 12 (8)                                                               | 16 (—)     | 1.5 (—) | —    | 0.125 | — (—)           | (—) |
| <i>sltB1/G/H/slt</i>  | 8 (—)                                                                | 16 (—)     | — (—)   | 0.75 | —     | — (—)           | (—) |
| <i>mltA</i>           | 8                                                                    | 16         | 1.5     | 1.5  | —     | —               | nd  |
| <i>mltB</i>           | 12 (—)                                                               | 32 (16)    | 1.5 (—) | 1.5  | —     | —               | nd  |
| <i>mltB</i> (E162A)   | 8 (—)                                                                | 16 (—)     | — (—)   | —    | nd    | nd              | nd  |
| <i>mltB/ampC</i>      | 8 (2)                                                                | 16 (4)     | — (—)   | 0.5  | nd    | nd              | nd  |
| <i>mltD</i>           | 12 (—)                                                               | 24 (16)    | — (—)   | —    | —     | — (—)           | (—) |
| <i>mltD</i> (E144A)   | — (—)                                                                | 16 (—)     | — (—)   | —    | nd    | nd              | nd  |
| <i>mltD/ampC</i>      | — (2)                                                                | 16 (4)     | — (—)   | 0.5  | nd    | nd              | nd  |
| <i>mltF</i>           | —                                                                    | 16         | —       | —    | —     | — (—)           | (—) |

|                      |           |         |           |      |       |           |       |
|----------------------|-----------|---------|-----------|------|-------|-----------|-------|
| <i>mltF2</i>         | 12 (—)    | 32 (16) | — (—)     | —    | —     | —         | nd    |
| <i>mltF2/ampC</i>    | — (—)     | 8 (4)   | —         | 0.5  | nd    | nd        | nd    |
| <i>mltB/F</i>        | 8         | —       | —         | —    | —     | —         | nd    |
| <i>mltD/F</i>        | —         | 8       | 0.75      | —    | —     | — (1,024) | (—)   |
| <i>mltB/D/F</i>      | 4 (2)     | 6 (4)   | 0.75 (1)  | —    | —     | —         | nd    |
| <i>mltA/B/F</i>      | —         | 8       | —         | —    | —     | —         | nd    |
| <i>mltB/F/F2</i>     | 4 (2)     | 6 (4)   | 0.75 (1)  | —    | —     | —         | nd    |
| <i>mltD/F/F2</i>     | 3 (1)     | 6 (4)   | — (1)     | 0.75 | —     | — (512)   | (—)   |
| <i>mltB/D/F/F2</i>   | 3 (1)     | 4 (4)   | — (1)     | —    | —     | — (256)   | (0.5) |
| <i>mltD/F/F2/slt</i> | 1.5 (0.5) | 2 (2)   | 0.5 (0.5) | 0.5  | 0.125 | 128 (256) | (0.5) |
| <i>mltA/B/D/F/F2</i> | 2 (0.5)   | 4 (4)   | 0.75      | 0.5  | 0.125 | 128 (128) | (0.5) |

<sup>a</sup>Abbreviations: PP, piperacillin; CT, cefotaxime; TZ, ceftazidime; IP, imipenem; CI, ciprofloxacin; VA, vancomycin; PMB, Polymyxin B; nd, not done; —, MIC is same as wild type.

<sup>b</sup>MICs in blue are  $\geq 2$ -fold higher than wild type, as confirmed by Etest and broth microdilution methods while those in red are  $\geq 2$ -fold lower than wild type, as also confirmed by both methods.

<sup>c</sup>MIC values in parentheses were determined using broth microdilution while all other MIC values were determined by Etest.

**Table S3. Summary of phenotypes associated with LT mutants.**

| Strain Name           | LTs Present <sup>a</sup>                                                                                                                        | Phenotypes           |                 |                            |                   |   |   |   |    |    |    |    |    |    |  |
|-----------------------|-------------------------------------------------------------------------------------------------------------------------------------------------|----------------------|-----------------|----------------------------|-------------------|---|---|---|----|----|----|----|----|----|--|
|                       |                                                                                                                                                 | $\beta$ -lactam MICs | OM permeability | Osmotic stress sensitivity | Biofilm formation |   |   |   |    |    |    |    |    |    |  |
| PAO1                  | <table border="1"> <tr><td>B1</td><td>G</td><td>H</td><td>Slt</td></tr> <tr><td>A</td><td>B</td><td>D</td><td>F</td><td>F2</td></tr> </table>   | B1                   | G               | H                          | Slt               | A | B | D | F  | F2 |    |    |    |    |  |
| B1                    | G                                                                                                                                               | H                    | Slt             |                            |                   |   |   |   |    |    |    |    |    |    |  |
| A                     | B                                                                                                                                               | D                    | F               | F2                         |                   |   |   |   |    |    |    |    |    |    |  |
| <i>slt</i>            | <table border="1"> <tr><td>B1</td><td>G</td><td>H</td></tr> <tr><td>A</td><td>B</td><td>D</td><td>F</td><td>F2</td></tr> </table>               | B1                   | G               | H                          | A                 | B | D | F | F2 | ↓  |    |    |    |    |  |
| B1                    | G                                                                                                                                               | H                    |                 |                            |                   |   |   |   |    |    |    |    |    |    |  |
| A                     | B                                                                                                                                               | D                    | F               | F2                         |                   |   |   |   |    |    |    |    |    |    |  |
| <i>slt</i> (E503)     | <table border="1"> <tr><td>B1</td><td>G</td><td>H</td><td>Slt</td></tr> <tr><td>A</td><td>B</td><td>D</td><td>F</td><td>F2</td></tr> </table>   | B1                   | G               | H                          | Slt               | A | B | D | F  | F2 | ↓  | nd | nd | nd |  |
| B1                    | G                                                                                                                                               | H                    | Slt             |                            |                   |   |   |   |    |    |    |    |    |    |  |
| A                     | B                                                                                                                                               | D                    | F               | F2                         |                   |   |   |   |    |    |    |    |    |    |  |
| <i>sltB1</i>          | <table border="1"> <tr><td></td><td>G</td><td>H</td><td>Slt</td></tr> <tr><td>A</td><td>B</td><td>D</td><td>F</td><td>F2</td></tr> </table>     |                      | G               | H                          | Slt               | A | B | D | F  | F2 | ↑  |    |    |    |  |
|                       | G                                                                                                                                               | H                    | Slt             |                            |                   |   |   |   |    |    |    |    |    |    |  |
| A                     | B                                                                                                                                               | D                    | F               | F2                         |                   |   |   |   |    |    |    |    |    |    |  |
| <i>sltG</i>           | <table border="1"> <tr><td>B1</td><td></td><td>H</td><td>Slt</td></tr> <tr><td>A</td><td>B</td><td>D</td><td>F</td><td>F2</td></tr> </table>    | B1                   |                 | H                          | Slt               | A | B | D | F  | F2 |    |    |    |    |  |
| B1                    |                                                                                                                                                 | H                    | Slt             |                            |                   |   |   |   |    |    |    |    |    |    |  |
| A                     | B                                                                                                                                               | D                    | F               | F2                         |                   |   |   |   |    |    |    |    |    |    |  |
| <i>sltH</i>           | <table border="1"> <tr><td>B1</td><td>G</td><td></td><td>Slt</td></tr> <tr><td>A</td><td>B</td><td>D</td><td>F</td><td>F2</td></tr> </table>    | B1                   | G               |                            | Slt               | A | B | D | F  | F2 | ↑  |    |    |    |  |
| B1                    | G                                                                                                                                               |                      | Slt             |                            |                   |   |   |   |    |    |    |    |    |    |  |
| A                     | B                                                                                                                                               | D                    | F               | F2                         |                   |   |   |   |    |    |    |    |    |    |  |
| <i>slt/mltB</i>       | <table border="1"> <tr><td>B1</td><td>G</td><td>H</td></tr> <tr><td>A</td><td></td><td>D</td><td>F</td><td>F2</td></tr> </table>                | B1                   | G               | H                          | A                 |   | D | F | F2 |    |    |    |    |    |  |
| B1                    | G                                                                                                                                               | H                    |                 |                            |                   |   |   |   |    |    |    |    |    |    |  |
| A                     |                                                                                                                                                 | D                    | F               | F2                         |                   |   |   |   |    |    |    |    |    |    |  |
| <i>slt/mltF</i>       | <table border="1"> <tr><td>B1</td><td>G</td><td>H</td></tr> <tr><td>A</td><td>B</td><td>D</td><td></td><td>F2</td></tr> </table>                | B1                   | G               | H                          | A                 | B | D |   | F2 | ↓  |    |    |    |    |  |
| B1                    | G                                                                                                                                               | H                    |                 |                            |                   |   |   |   |    |    |    |    |    |    |  |
| A                     | B                                                                                                                                               | D                    |                 | F2                         |                   |   |   |   |    |    |    |    |    |    |  |
| <i>sltB1/mltB</i>     | <table border="1"> <tr><td></td><td>G</td><td>H</td><td>Slt</td></tr> <tr><td>A</td><td></td><td>D</td><td>F</td><td>F2</td></tr> </table>      |                      | G               | H                          | Slt               | A |   | D | F  | F2 | ↑  |    |    |    |  |
|                       | G                                                                                                                                               | H                    | Slt             |                            |                   |   |   |   |    |    |    |    |    |    |  |
| A                     |                                                                                                                                                 | D                    | F               | F2                         |                   |   |   |   |    |    |    |    |    |    |  |
| <i>sltB1/slt</i>      | <table border="1"> <tr><td></td><td>G</td><td>H</td></tr> <tr><td>A</td><td>B</td><td>D</td><td>F</td><td>F2</td></tr> </table>                 |                      | G               | H                          | A                 | B | D | F | F2 | ↑  |    |    |    |    |  |
|                       | G                                                                                                                                               | H                    |                 |                            |                   |   |   |   |    |    |    |    |    |    |  |
| A                     | B                                                                                                                                               | D                    | F               | F2                         |                   |   |   |   |    |    |    |    |    |    |  |
| <i>sltB1/G</i>        | <table border="1"> <tr><td></td><td></td><td>H</td><td>Slt</td></tr> <tr><td>A</td><td>B</td><td>D</td><td>F</td><td>F2</td></tr> </table>      |                      |                 | H                          | Slt               | A | B | D | F  | F2 | ↑  |    |    |    |  |
|                       |                                                                                                                                                 | H                    | Slt             |                            |                   |   |   |   |    |    |    |    |    |    |  |
| A                     | B                                                                                                                                               | D                    | F               | F2                         |                   |   |   |   |    |    |    |    |    |    |  |
| <i>sltB1/H</i>        | <table border="1"> <tr><td></td><td>G</td><td></td><td>Slt</td></tr> <tr><td>A</td><td>B</td><td>D</td><td>F</td><td>F2</td></tr> </table>      |                      | G               |                            | Slt               | A | B | D | F  | F2 | ↑  |    |    |    |  |
|                       | G                                                                                                                                               |                      | Slt             |                            |                   |   |   |   |    |    |    |    |    |    |  |
| A                     | B                                                                                                                                               | D                    | F               | F2                         |                   |   |   |   |    |    |    |    |    |    |  |
| <i>sltB1/G/mltB</i>   | <table border="1"> <tr><td></td><td></td><td>H</td><td>Slt</td></tr> <tr><td>A</td><td></td><td>D</td><td>F</td><td>F2</td></tr> </table>       |                      |                 | H                          | Slt               | A |   | D | F  | F2 | ↑  |    |    |    |  |
|                       |                                                                                                                                                 | H                    | Slt             |                            |                   |   |   |   |    |    |    |    |    |    |  |
| A                     |                                                                                                                                                 | D                    | F               | F2                         |                   |   |   |   |    |    |    |    |    |    |  |
| <i>sltB1/G/H</i>      | <table border="1"> <tr><td></td><td></td><td></td><td>Slt</td></tr> <tr><td>A</td><td>B</td><td>D</td><td>F</td><td>F2</td></tr> </table>       |                      |                 |                            | Slt               | A | B | D | F  | F2 | ↑  |    |    |    |  |
|                       |                                                                                                                                                 |                      | Slt             |                            |                   |   |   |   |    |    |    |    |    |    |  |
| A                     | B                                                                                                                                               | D                    | F               | F2                         |                   |   |   |   |    |    |    |    |    |    |  |
| <i>sltB1/G/H/mltB</i> | <table border="1"> <tr><td></td><td></td><td></td><td>Slt</td></tr> <tr><td>A</td><td></td><td>D</td><td>F</td><td>F2</td></tr> </table>        |                      |                 |                            | Slt               | A |   | D | F  | F2 | ↑  | ↑  |    |    |  |
|                       |                                                                                                                                                 |                      | Slt             |                            |                   |   |   |   |    |    |    |    |    |    |  |
| A                     |                                                                                                                                                 | D                    | F               | F2                         |                   |   |   |   |    |    |    |    |    |    |  |
| <i>sltB1/G/H/slt</i>  | <table border="1"> <tr><td></td><td></td><td></td><td></td><td></td></tr> <tr><td>A</td><td>B</td><td>D</td><td>F</td><td>F2</td></tr> </table> |                      |                 |                            |                   |   | A | B | D  | F  | F2 |    |    |    |  |
|                       |                                                                                                                                                 |                      |                 |                            |                   |   |   |   |    |    |    |    |    |    |  |
| A                     | B                                                                                                                                               | D                    | F               | F2                         |                   |   |   |   |    |    |    |    |    |    |  |
| <i>mltA</i>           | <table border="1"> <tr><td>B1</td><td>G</td><td>H</td><td>Slt</td></tr> <tr><td></td><td>B</td><td>D</td><td>F</td><td>F2</td></tr> </table>    | B1                   | G               | H                          | Slt               |   | B | D | F  | F2 |    | ↑  |    |    |  |
| B1                    | G                                                                                                                                               | H                    | Slt             |                            |                   |   |   |   |    |    |    |    |    |    |  |
|                       | B                                                                                                                                               | D                    | F               | F2                         |                   |   |   |   |    |    |    |    |    |    |  |

|                      |                                                                                     |    |    |    |    |
|----------------------|-------------------------------------------------------------------------------------|----|----|----|----|
| <i>mltA</i> (D350A)  |    | nd |    | nd | nd |
| <i>mltB</i>          |    | ↑  |    |    |    |
| <i>mltB</i> (E162A)  |    |    | nd | nd | nd |
| <i>mltD</i>          |    | ↑  | ↑  |    | ↓  |
| <i>mltD</i> (E144A)  |    |    |    | nd | nd |
| <i>mltF</i>          |    |    |    |    |    |
| <i>mltF2</i>         |    | ↑  |    |    |    |
| <i>mltB/F</i>        |    |    |    | ↑  |    |
| <i>mltD/F</i>        |    |    |    | ↑  |    |
| <i>mltB/D/F</i>      |   | ↓  | ↑  | ↑  |    |
| <i>mltA/B/F</i>      |  |    |    | ↑  |    |
| <i>mltB/F/F2</i>     |  | ↓  | ↑  | ↑  |    |
| <i>mltD/F/F2</i>     |  | ↓  | ↑  | ↑  | ↑  |
| <i>mltB/D/F/F2</i>   |  | ↓  | ↑  | ↑  | ↑  |
| <i>mltD/F/F2/slt</i> |  | ↓  | ↑  | ↑  | ↑  |
| <i>mltA/B/D/F/F2</i> |  | ↓  | ↑  | ↑  | ↑  |

<sup>a</sup>Green squares represent sLTs; purple squares represent mLTs; yellow squares represent the active-site mutant version; nd, not done. Red arrows show a decrease compared to wild type, blue arrows, an increase compared to wild type.

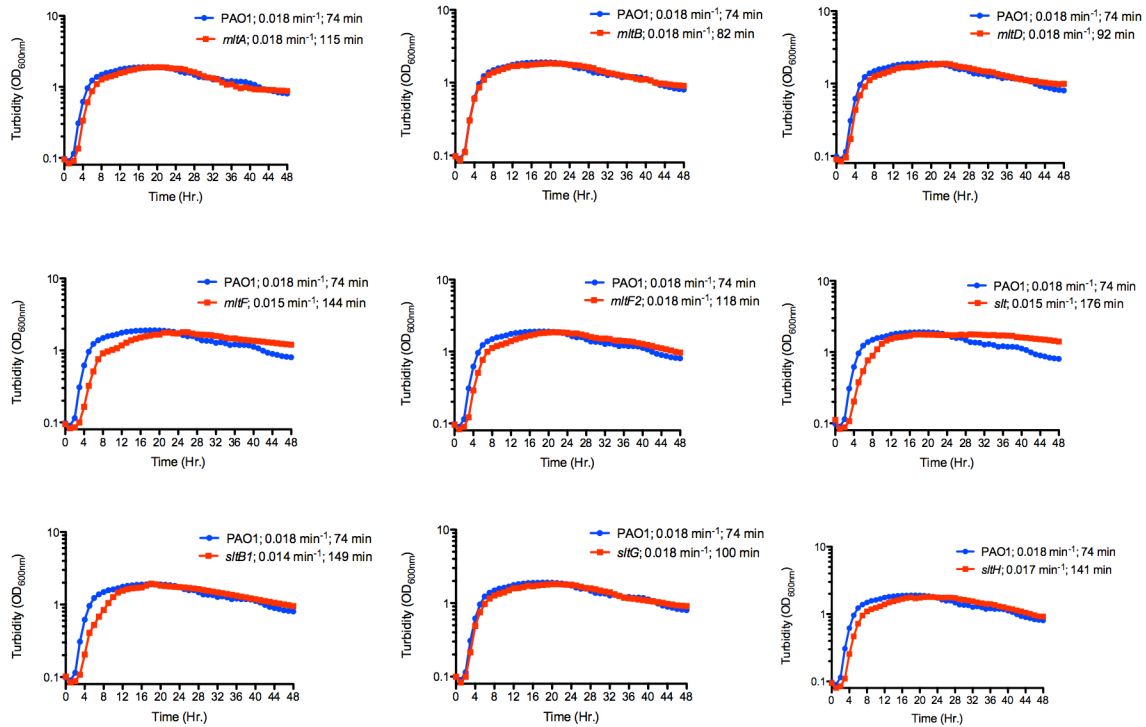

**Figure S1. Loss of LTs does not cause growth defects.** Bacterial growth ( $OD_{600nm}$ ) was monitored every hour for 48 hours using a plate-based assay, described below. Curves are average of three biological replicates with three technical replicates each. Following the strain names in each legend are the growth rates per minute ( $\text{min}^{-1}$ ) and lag times (in minutes), respectively.

### Bacterial growth assays

Bacterial growth was monitored for 48 h using a plate-based assay. Overnight bacterial cultures (5mL LB) were subcultured 1:200 in fresh LB and 300  $\mu\text{L}$  of each sample was added to triplicate wells of a sterile 100-well Honeycomb 2 plate (Oy Growth Curves Ab Ltd). Plates were incubated in a Bioscreen C plate reader (Oy Growth Curves Ab Ltd) for 48 h at  $37^\circ\text{C}$  with medium shaking. Turbidity readings were taken every hour at  $OD_{600nm}$ . Growth data were analyzed using GraphPad Prism software V5.0C. Growth rates and lag times were calculated using *GrowthRates* Software version 1.9 (Bellingham Research Institute), as previously described (Hall *et al.*, 2014. Growth rates made easy. *Molecular Biology and Evolution* **31**:232-238).

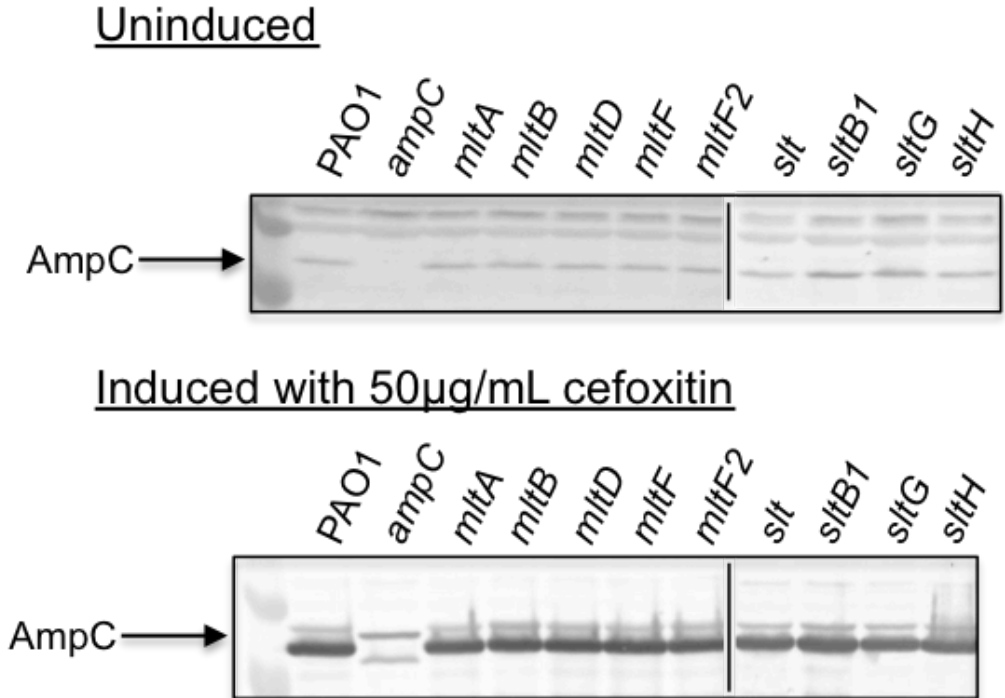

**Figure S2. Loss of LTs does not affect AmpC expression.** Strains lacking the indicated LT were grown under basal (top panel) or AmpC-inducing (bottom panel) conditions and immunoblotted using  $\alpha$ -AmpC antibodies, as described in the Materials and Methods. Loss of LTs does not prevent either basal AmpC expression or AmpC induction.

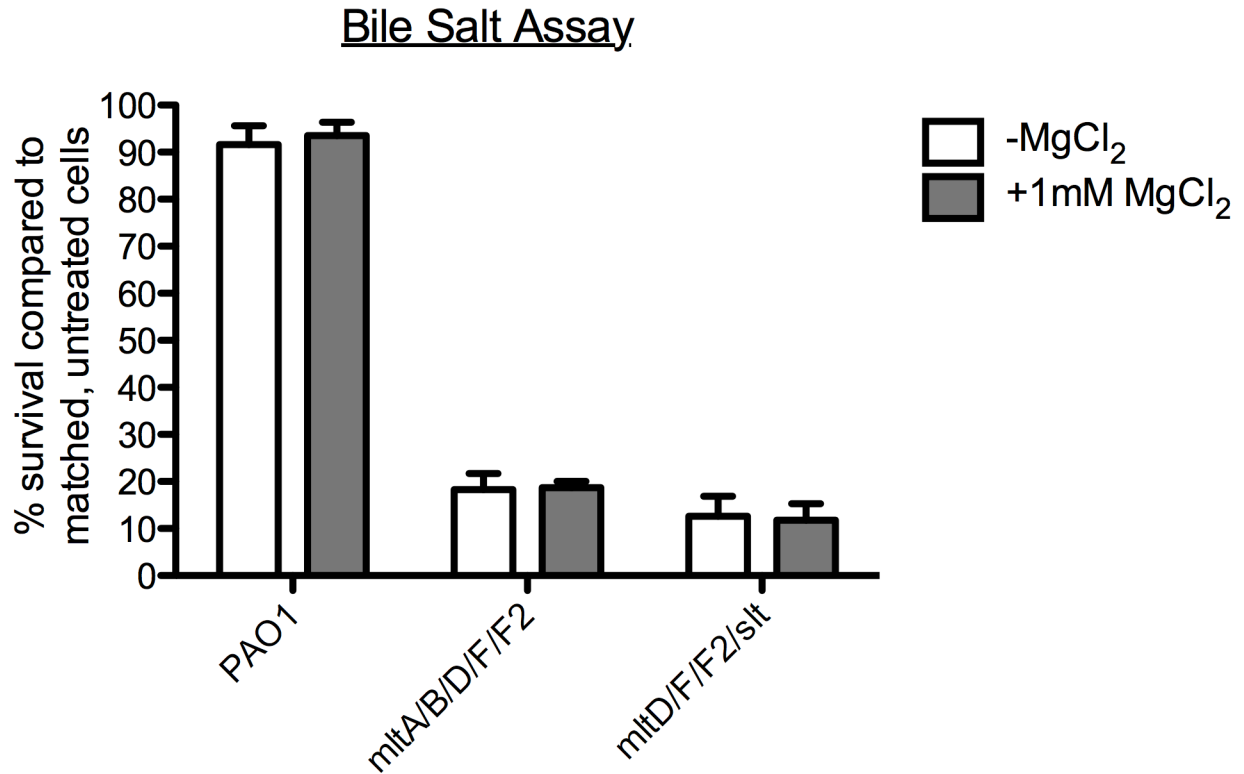

**Figure S3. Magnesium supplementation does not affect bile salt sensitivity in mLT mutants.** Bile salt assays were performed as described in the Materials and Methods with and without MgCl<sub>2</sub> (1mM final) supplementation. Bile salt sensitivity of the *mltA/B/D/F/F2* and *mltD/F/F2/slt* mutants was unaffected by the addition of magnesium. Bars representing non-MgCl<sub>2</sub>-treated samples are the same as those used in **Figure 3a**. N=3. Bars represent the means  $\pm$  SEM.
